# Supplementary material for: Agreement between two large pan-cancer CRISPR-Cas9 gene dependency data sets
Source: PubMed Central journal article supplement (PMC6925302; doi:10.1038/s41467-019-13805-y), 2019-12-20
Supplement: 41467_2019_13805_MOESM3_ESM.pdf [file 41467_2019_13805_MOESM3_ESM.pdf]

## **Description of Additional Supplementary Files**

File Name: Supplementary Data 1

Description: Experimental pipelines' specifications

File Name: Supplementary Data 2

Description: Cell lines screened in both studies

File Name: Supplementary Data 3

Description: Common dependencies in each study

File Name: Supplementary Data 4

Description: Gene NormLRT scores in both studies

File Name: Supplementary Data 5

Description: (a) Studies' agreement across tissues; (b) Cell line molecular features used in the systematic inference of gene essentiality markers

File Name: Supplementary Data 6

Description: Dependency markers test results from the two individual studies

File Name: Supplementary Data 7

Description: Marker consistency via ROC analysis

File Name: Supplementary Data 8

Description: GO:terms enriched in the Broad-exclusive dependencies
